# Supplementary material for: Paraventricular thalamic nucleus plays a critical role in consolation and anxious behaviors of familiar observers exposed to surgery mice
Source: PubMed Central journal article supplement (PMC7914349; doi:10.7150/thno.45690), 2021-02-06
Supplement: thnov11p3813s1.pdf [file thnov11p3813s1.pdf]

**Figure legend for supplemental figures**

**Familiar observers/Surgery mice**

|       | Ratio | P value |
|-------|-------|---------|
| HIPPO | 1.24  | 0.2189  |
| ZI    | 1.06  | 0.8191  |
| VMH   | 0.98  | 0.9210  |
| Acb   | 0.87  | 0.2534  |
| PVT   | 0.86  | 0.3801  |
| PFC   | 0.73  | 0.0409  |
| Pir   | 0.59  | 0.0557  |
| DM    | 0.54  | 0.0086  |
| XI    | 0.47  | 0.0022  |
| IMD   | 0.20  | 0.0001  |
| BMA   | 0.00  | 0.0001  |
| CM    | 0.00  | 0.0001  |

**Figure S1.** Heat map of the comparisons between familiar observers and surgery mice.

**Table S1. KEY RESOURCES**

| <b>REAGENT or RESOURCE</b>                     | <b>SOURCE</b>     | <b>IDENTIFIER</b> |
|------------------------------------------------|-------------------|-------------------|
| <b>Antibodies</b>                              |                   |                   |
| Rabbit polyclonal to c-Fos                     | Abcam             | Cat#ab190289      |
| Mouse monoclonal [2H2] to c-Fos                | Abcam             | Cat#ab208942      |
| Rabbit orexin receptor 1+2 polyclonal antibody | Bioss antibodies  | Cat#bs-1095R      |
| Anti-NeuN Antibody, clone A60                  | Sigma-Aldrich     | Cat#MAB377        |
| Rabbit polyclonal to Orexin A                  | Abcam             | Cat#ab6214        |
| Donkey anti-Rabbit Alexa Fluor 488             | Life Technologies | Cat#A21206        |
| Donkey anti-Mouse Alexa Fluor 488              | Invitrogen        | Cat#A21202        |
| Donkey anti-Rabbit Alexa Fluor 594             | Invitrogen        | Cat#A21207        |
| Donkey anti-Mouse Alexa Fluor 594              | Invitrogen        | Cat#A21203        |
| Hochest                                        | Thermo Scientific | Cat#RC 21732420   |
| <b>Viruses</b>                                 |                   |                   |
| pAAV2-hSyn-hM4D(Gi)-mCherry                    | Addgene           | Cat#50475-AAV2    |
| pAAV2-hSyn-mCherry                             | Addgene           | Cat#114472-AAV2   |
| pAAV2-hSyn-EGFP                                | Addgene           | Cat#50465-AAV2    |
| <b>Drugs</b>                                   |                   |                   |
| DREADD Agonist 21                              | Abcam             | Cat#ab235545      |
| Ibotenic acid                                  | Abcam             | Cat#ab120041      |
| <b>Critical Commercial Assays</b>              |                   |                   |
| Mouse IL-6 Immunoassay                         | R&D systems       | Cat#M600B         |
| <b>Chemicals</b>                               |                   |                   |
| 10× RIPA Buffer                                | Thermo Scientific | Cat#89901         |
| Ketamine                                       | Zoetis            | N/A               |

**Table S2. Statistical values of ANOVAs**

| Data location in the figures          | F or H values               | P values |
|---------------------------------------|-----------------------------|----------|
| Figure 1C (Grey + black zones)        | F(2,36) = 7.609             | 0.002    |
| Figure 1C (light zones)               | F(2,36) = 13.156            | < 0.001  |
| Figure 2E                             | H = 4.550 (df = 2) on rank  | 0.103    |
| Figure 4B                             | F(3,20) = 11.505            | < 0.001  |
| Figure 4D                             | F(3,22) = 14.383            | < 0.001  |
| Figure 4E                             | F(3,25) = 5.962             | 0.003    |
| Figure 4G                             | F(2,12) = 19.517            | < 0.001  |
| Figure 4I                             | F(4,24) = 6.188             | 0.001    |
| Figure 5A at 2 h after interaction    | F(4,21) = 68.619            | < 0.001  |
| Figure 5A at 6 h after interaction    | F(4,21) = 41.494            | < 0.001  |
| Figure 5A at 24 h after interaction   | F(4, 21) = 6.065            | 0.002    |
| Figure 5B at 2 h after interaction    | F(4,21) = 1.166             | 0.354    |
| Figure 5B at 6 h after interaction    | F(4, 21) = 5.688            | 0.003    |
| Figure 5B at 24 h after interaction   | F(4,21) = 4.501             | 0.009    |
| Figure 5C at 2 h after interaction    | F(4,21) = 2.642             | 0.062    |
| Figure 5C at 6 h after interaction    | F(4,21) = 13.857            | < 0.001  |
| Figure 5C at 24 h after interaction   | F(4,21) = 17.475            | < 0.001  |
| Figure 5D Serum                       | F(2,15) = 2.516             | 0.114    |
| Figure 5D Hippocampus                 | F(2,21) = 3.577             | 0.046    |
| Figure 5D Cerebral cortex             | F(2,19) = 6.515             | 0.007    |
| Figure 6D Allo-grooming               | F(2,34) = 28.913            | < 0.001  |
| Figure 6D Allo-licking                | F(2,34) = 6.123             | 0.005    |
| Figure 6D Allo-grooming + all-licking | F(2, 34) = 32.045           | < 0.001  |
| Figure 6E Grey + black zone           | F(3,45) = 4.267             | 0.010    |
| Figure 6E Light zone                  | F(3,45) = 4.267             | 0.010    |
| Figure 7B Allo-grooming               | H = 11.901 (df = 3) on rank | 0.008    |
| Figure 7B Allo-licking                | H = 9.275 (df = 3) on rank  | 0.026    |
| Figure 7B Allo-grooming + all-licking | H = 12.711 (df = 3) on rank | 0.005    |
| Figure 7C Grey + black zone           | F(4,56) = 2.942             | 0.028    |
| Figure 7C Light zone                  | F(4,56) = 3.425             | 0.014    |
| Figure 8B Allo-grooming               | F(2,36) = 5.847             | 0.006    |
| Figure 8B Allo-licking                | F(2,36) = 4.197             | 0.023    |
| Figure 8B Allo-grooming + all-licking | F(2,36) = 8.771             | < 0.001  |
| Figure 8C Grey + black zone           | F(3,50) = 4.283             | 0.009    |
| Figure 8C Light zone                  | F(3,50) = 5.435             | 0.003    |
